# Supplementary material for: Adenine-(methoxy)-ethoxy-Pα,α-dithio-triphosphate inhibits pathologic calcium pyrophosphate deposition in osteoarthritic human chondrocytes
Source: Royal Society of Chemistry journal article supplement (doi:10.1039/c9ob02199j), 2019-01-01
Supplement: c9ob02199j1.pdf [file c9ob02199j1.pdf]

## Supporting information

### **Adenine-(methoxy)ethoxy- $P_{\alpha,\alpha}$ -dithio-triphosphate efficaciously and potently inhibits pathologic calcium pyrophosphate deposition in osteoarthritic human chondrocytes**

Molhm Nassir<sup>a</sup>, Salahuddin Mirza<sup>b</sup>, Uri Arad<sup>c</sup>, Sangyong Lee<sup>b</sup>,  
Muhammad Rafehi<sup>b</sup>, Isaac Yaw Attah<sup>b</sup>, Christian Renn<sup>b</sup>, Herbert Zimmermann,<sup>d</sup> Julie  
Pelletier,<sup>e</sup> Jean Sévigny<sup>e,f</sup>, Christa E. Müller<sup>b</sup>, and Bilha Fischer<sup>a\*</sup>

<sup>a</sup> Department of Chemistry, Bar-Ilan University, Ramat-Gan 52900 Israel

<sup>b</sup> PharmaCenter Bonn, Pharmaceutical Institute, Pharmaceutical Chemistry I, University of Bonn, Bonn, Germany,

<sup>c</sup> Department of Rheumatology, Tel Aviv Medical Center and the Faculty of Medicine, Tel Aviv University, Tel Aviv, 6997801, Israel

<sup>d</sup> Institute of Cell Biology and Neuroscience, Goethe University, 60438 Frankfurt am Main, Germany.

<sup>e</sup> Centre de Recherche du CHU de Québec – Université Laval, Québec City, QC, Canada

<sup>f</sup> Département de Microbiologie-Inféctiologie et d'Immunologie, Faculté de Médecine, Université Laval, Québec City, QC, Canada

#### **Contents:**

<sup>31</sup>P/<sup>1</sup>H/<sup>13</sup>C and DEPT NMR spectra of compounds **7-10**.

$^{31}\text{P}/^1\text{H}/^{13}\text{C}$  and DEPT NMR spectra of Adenine-(methoxy)ethoxy- $\text{P}_{\alpha,\alpha}$ -dithio-diphosphate,  
7.

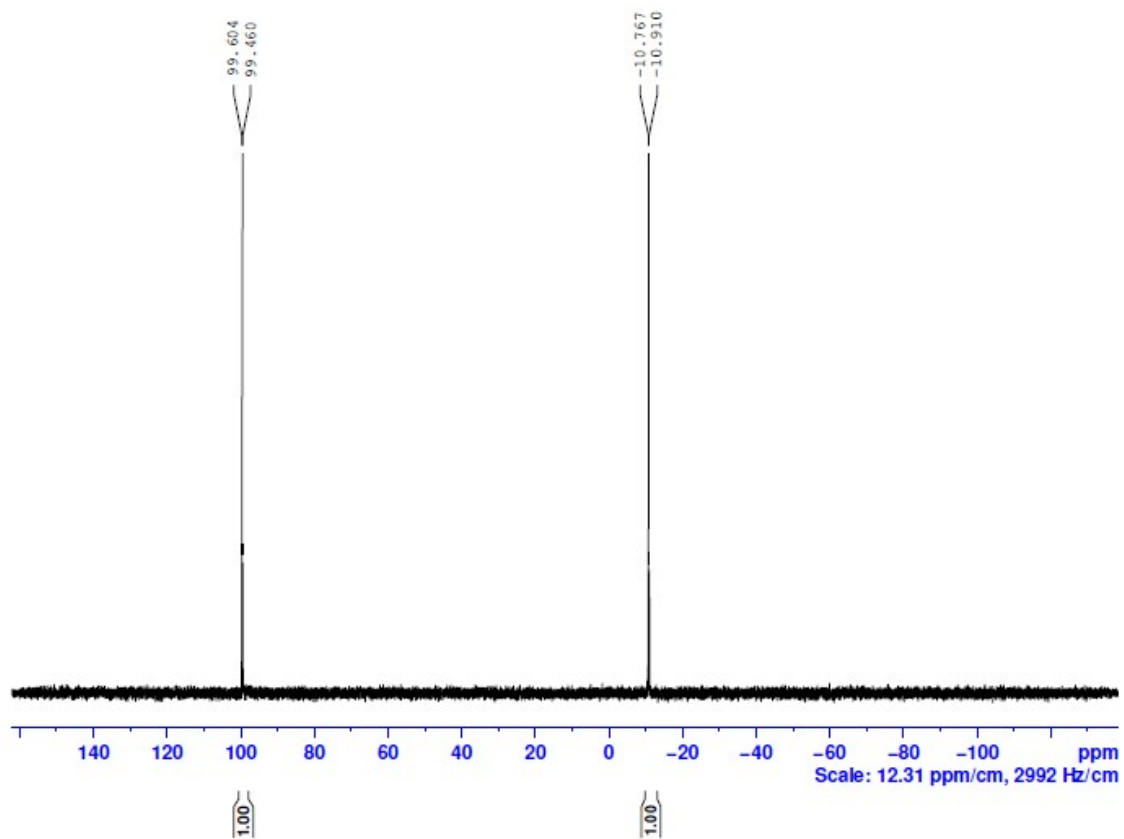

$^{31}\text{P}$  NMR spectra

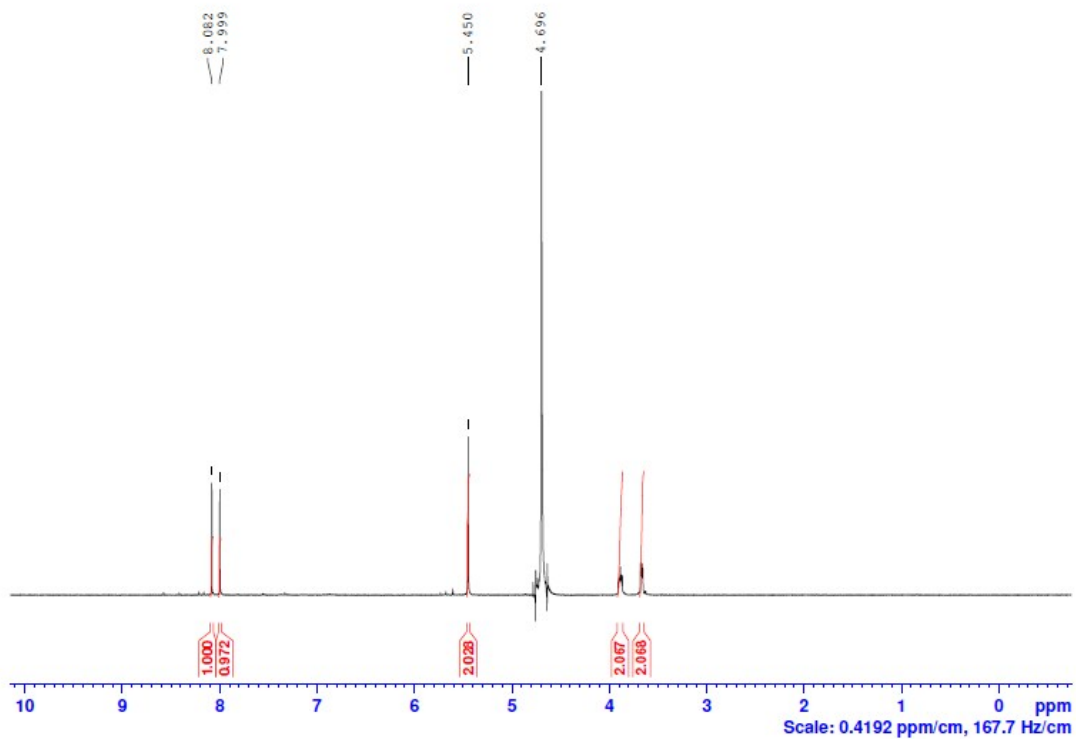

<sup>1</sup>H NMR spectra

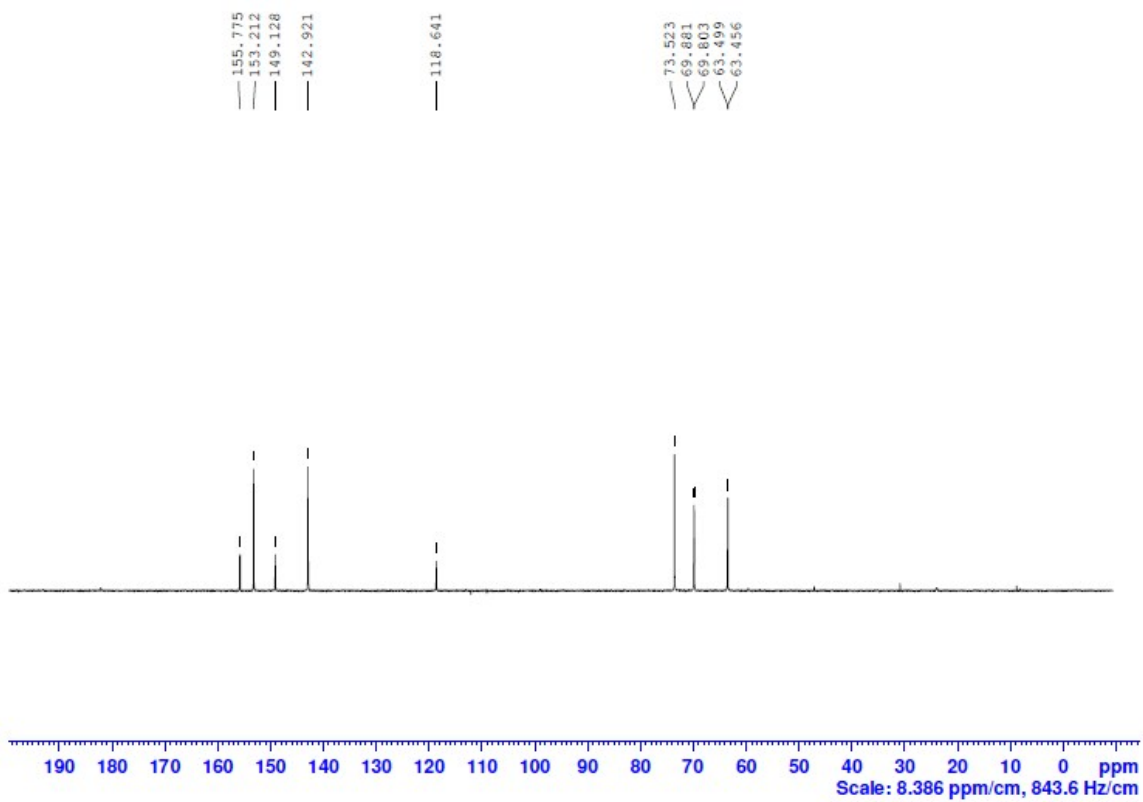

<sup>13</sup>C NMR spectra

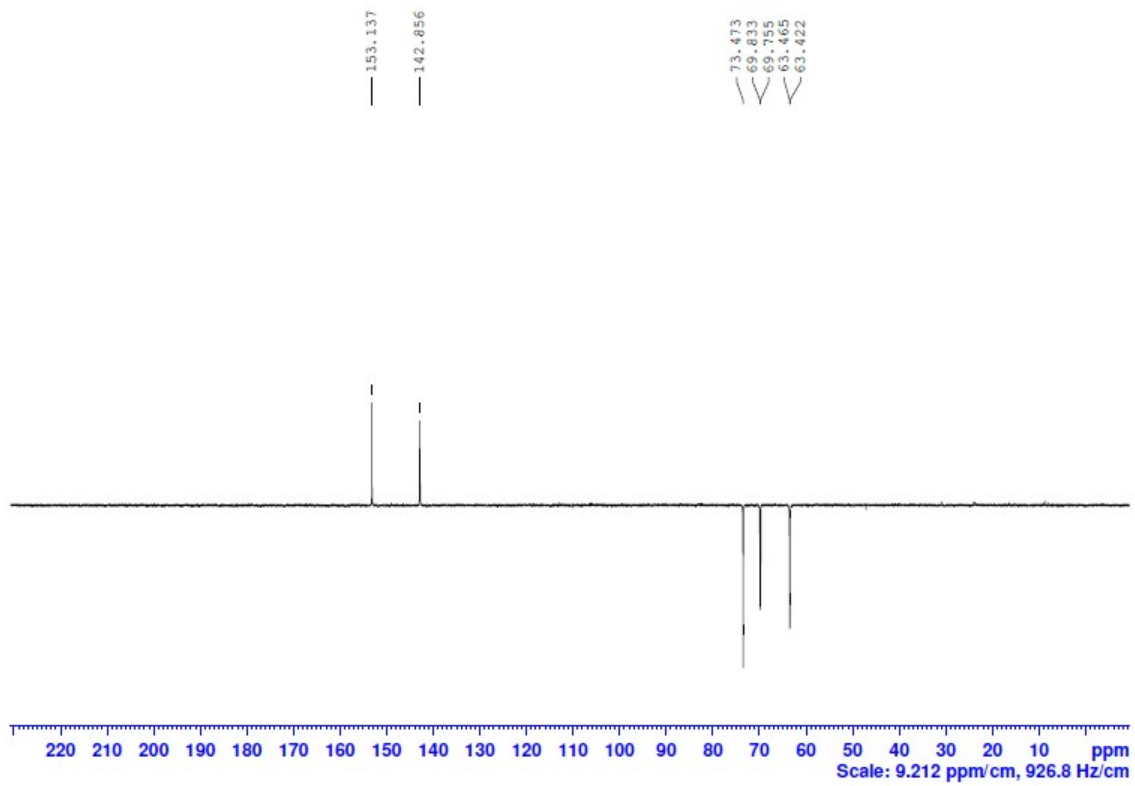

DEPT NMR spectra

$^{31}\text{P}/^1\text{H}/^{13}\text{C}$  and DEPT NMR spectra of Adenine-(methoxy)ethoxy- $\text{P}_{\alpha,\alpha}$ -dithio-triphosphate, **8**

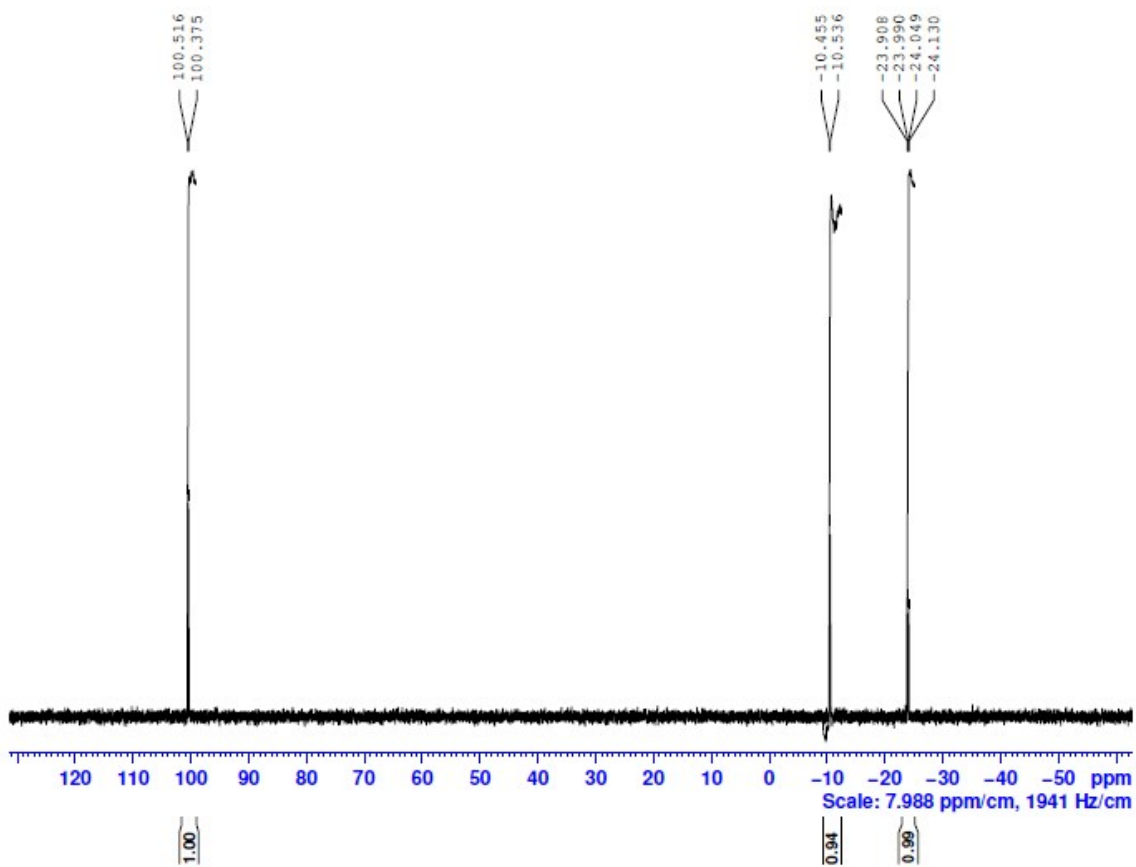

$^{31}\text{P}$  NMR spectra

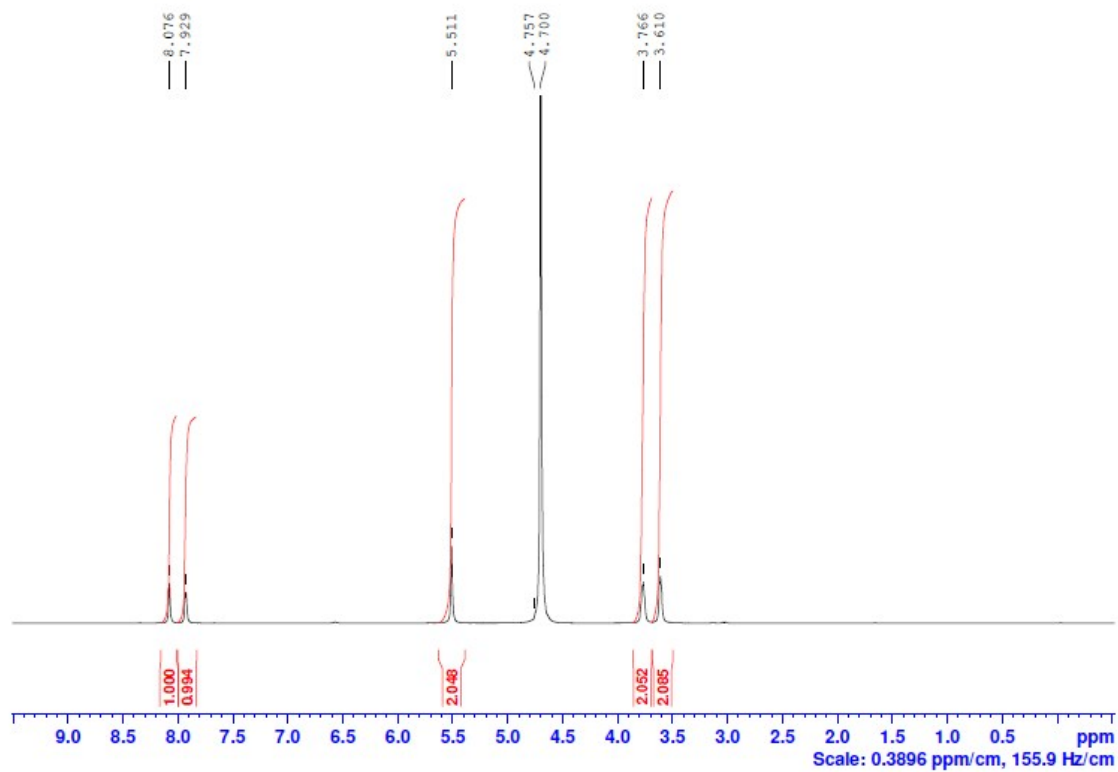

<sup>1</sup>H NMR spectra

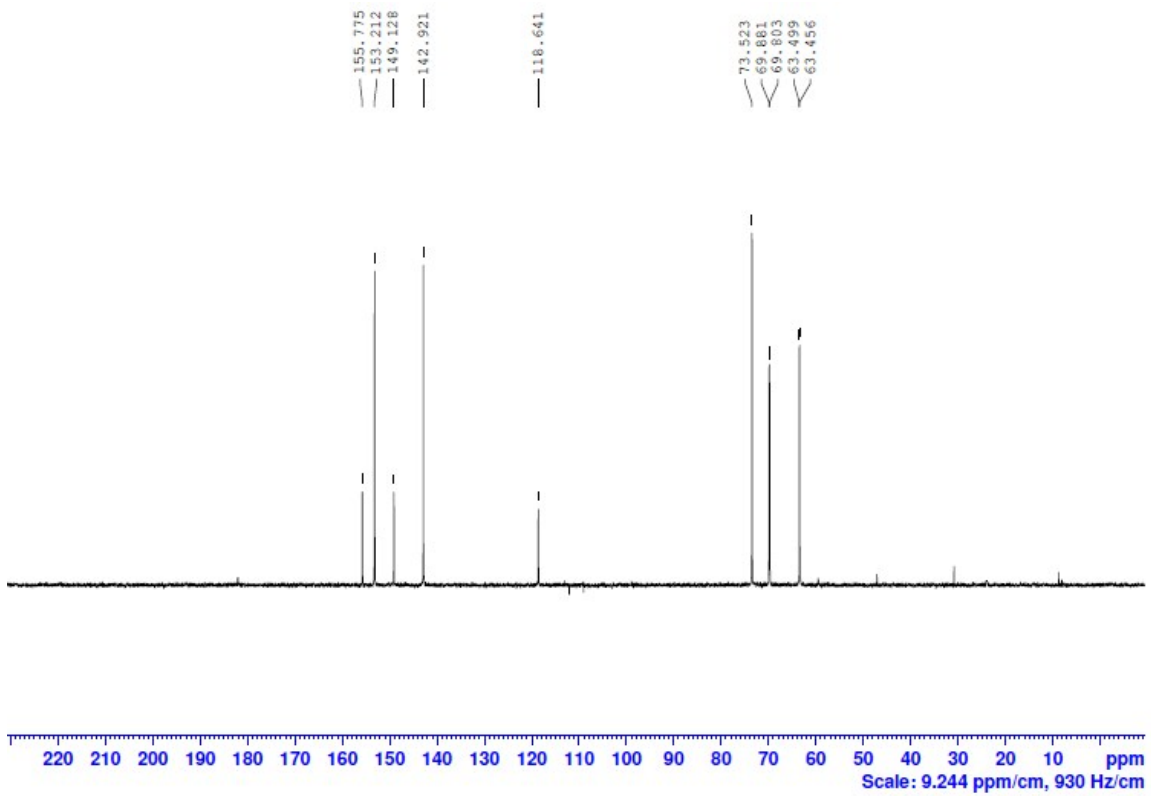

$^{13}\text{C}$  NMR spectra

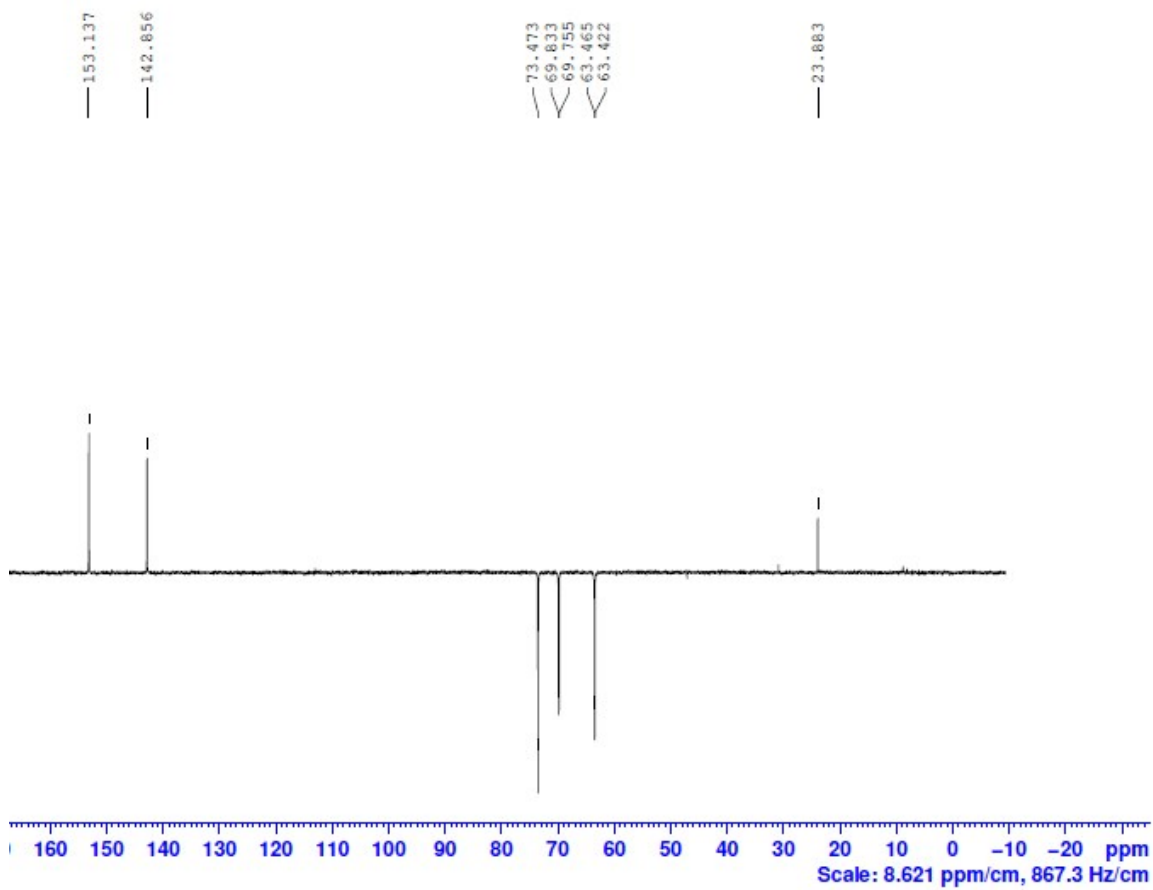

DEPT NMR spectra



$^{31}\text{P}/^1\text{H}/^{13}\text{C}$  and DEPT NMR spectra of Adenine-(methoxy)ethoxy- $\text{P}_{\alpha,\alpha}$ -dithio- $\beta,\gamma$ -methylene-triphosphate, **9**

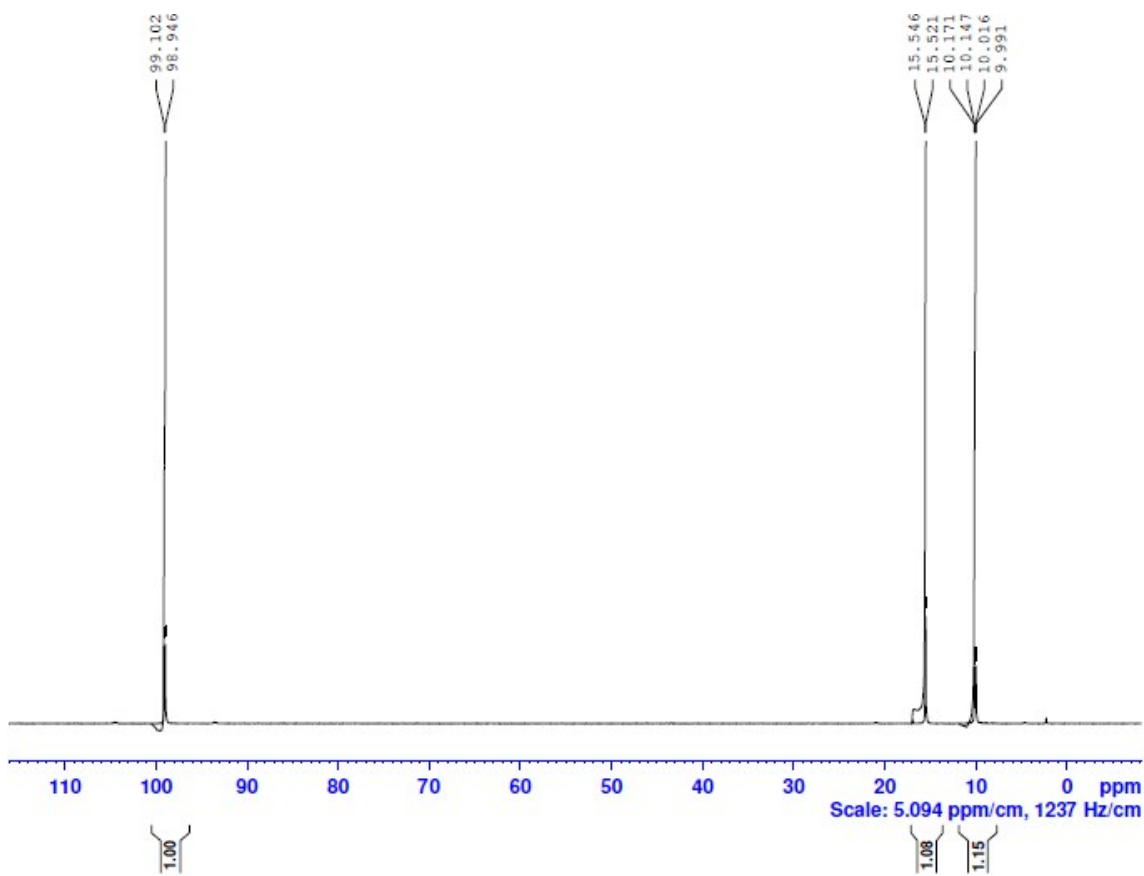

$^{31}\text{P}$  NMR spectra

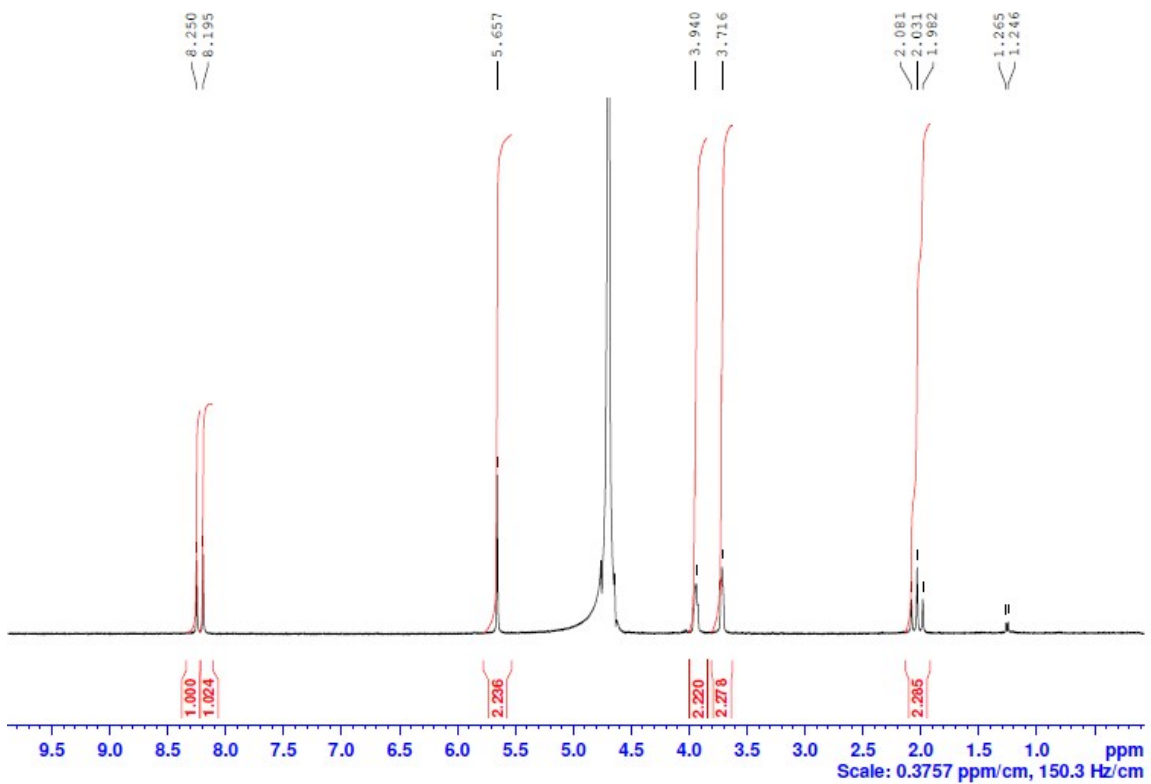

$^1\text{H}$  NMR spectra

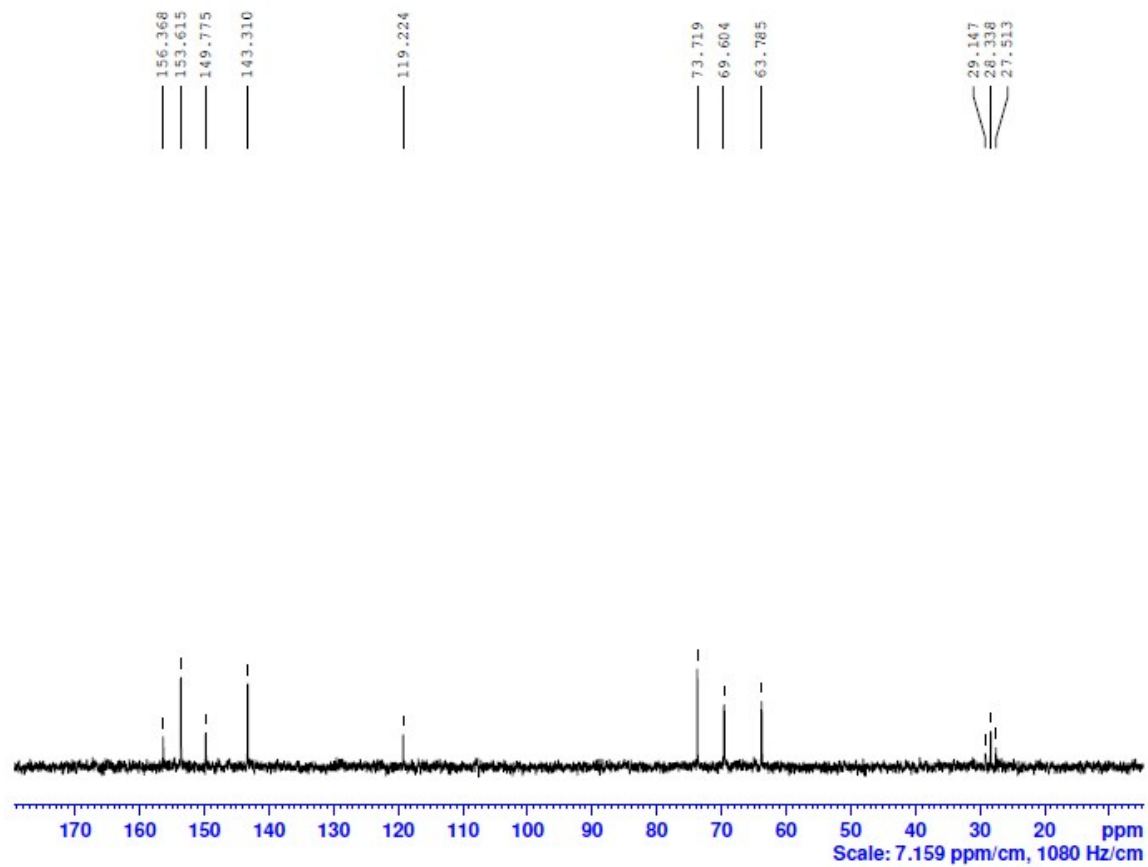

$^{13}\text{C}$  NMR spectra

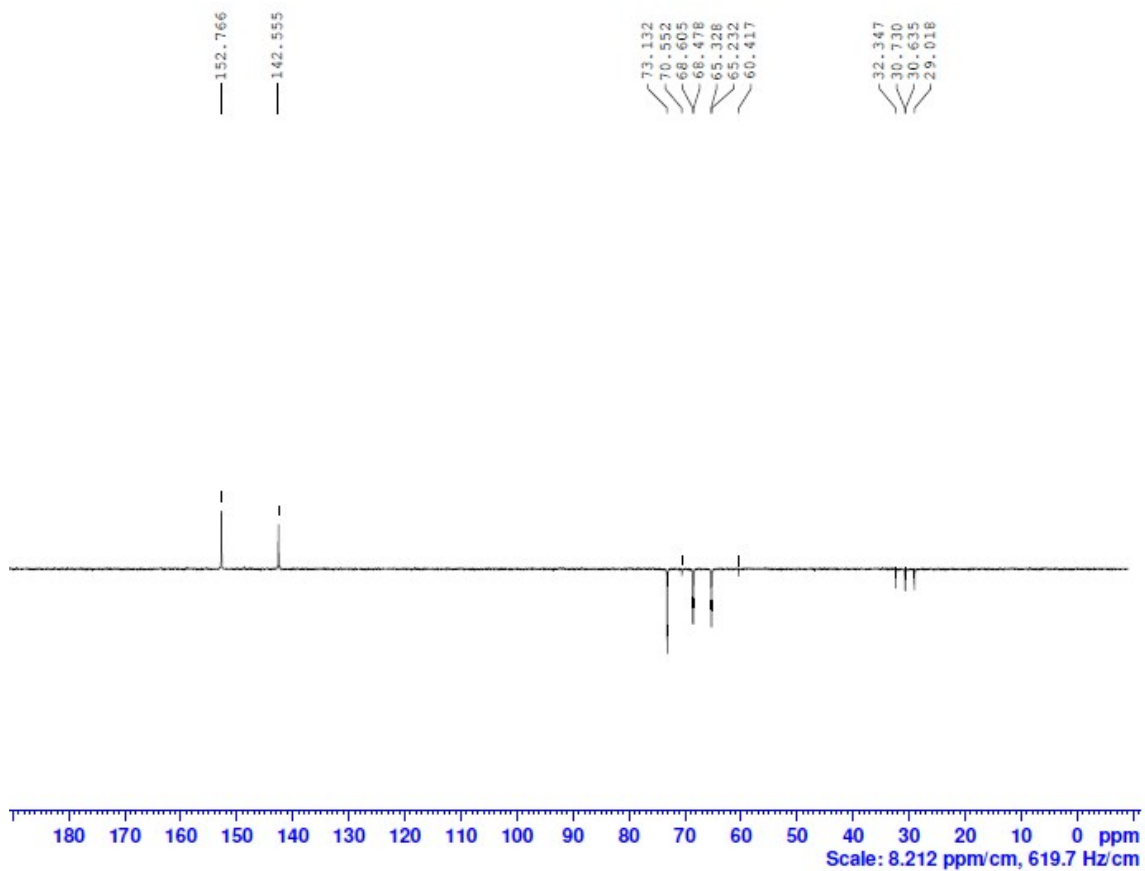

DEPT NMR spectra

$^{31}\text{P}/^1\text{H}/^{13}\text{C}$  and DEPT NMR spectra of **Adenine-(methoxy)ethoxy- $\text{P}_{\alpha,\alpha}$ -dithio $\beta,\gamma$ -dichloro-methylene triphosphate, 10**

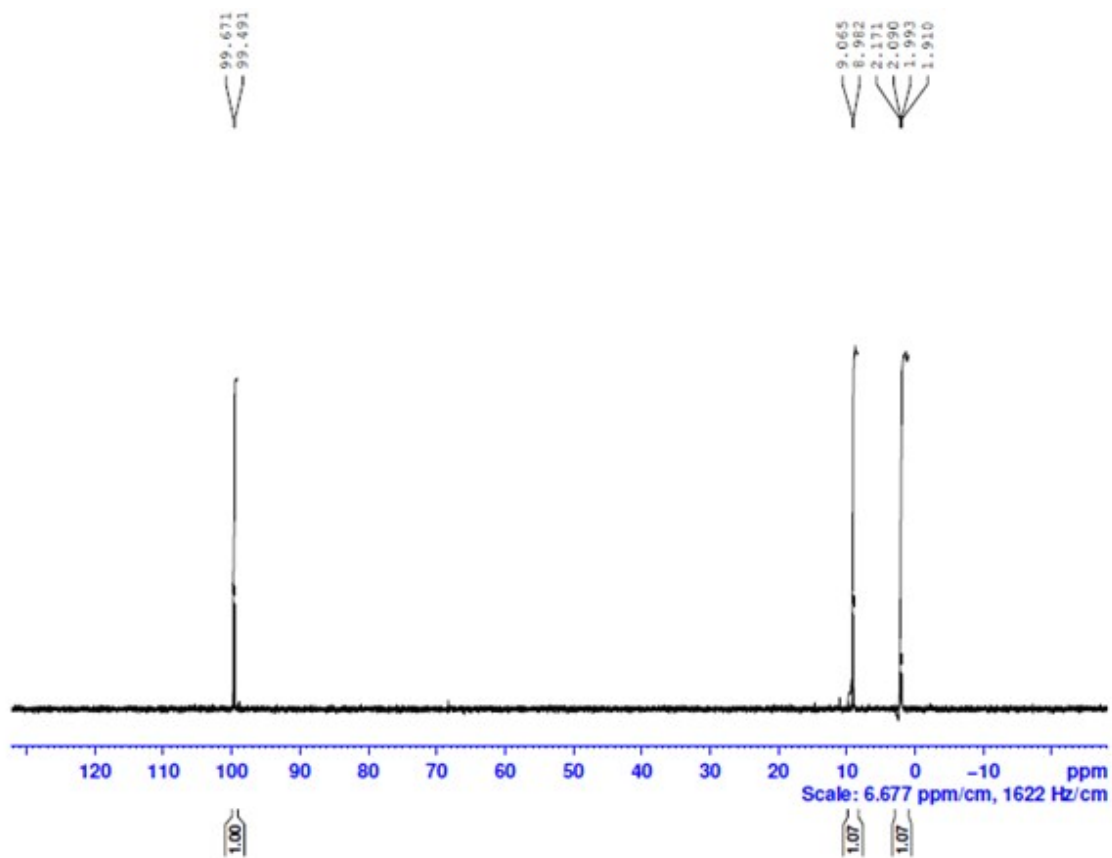

$^{31}\text{P}$  NMR spectra

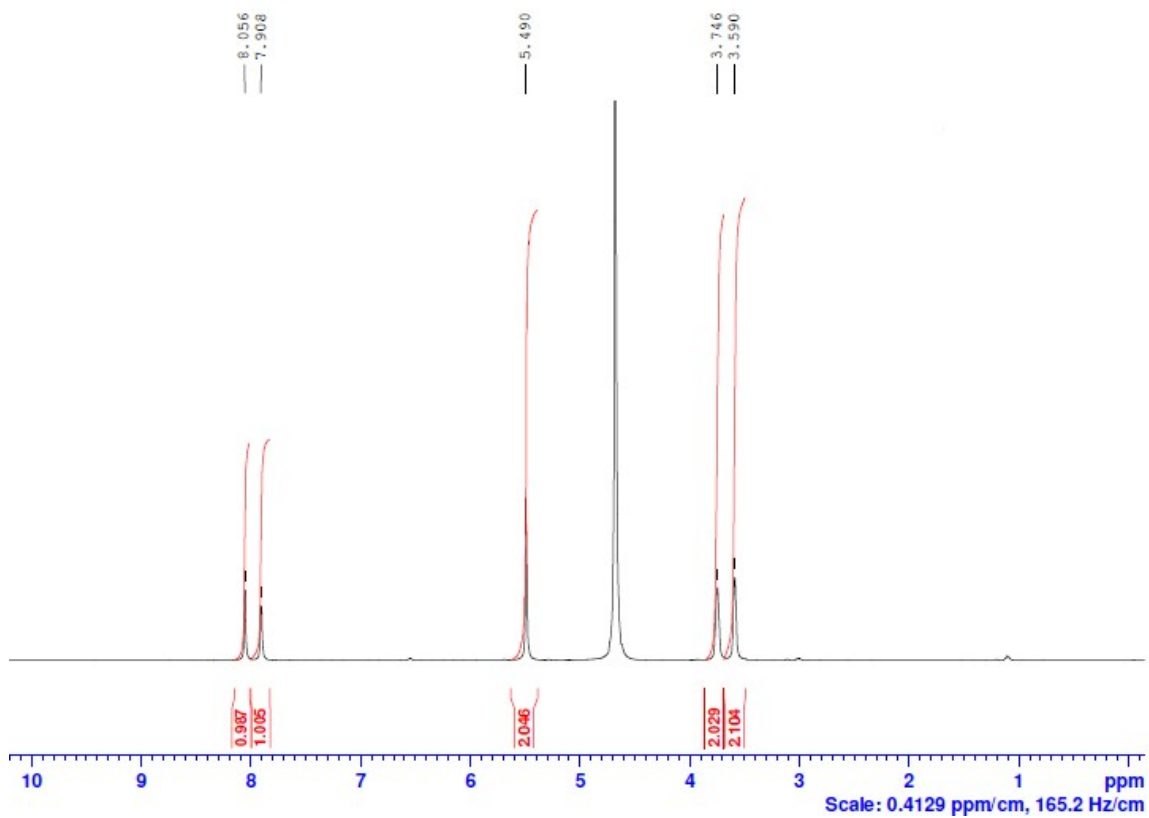

$^1\text{H}$  NMR spectra

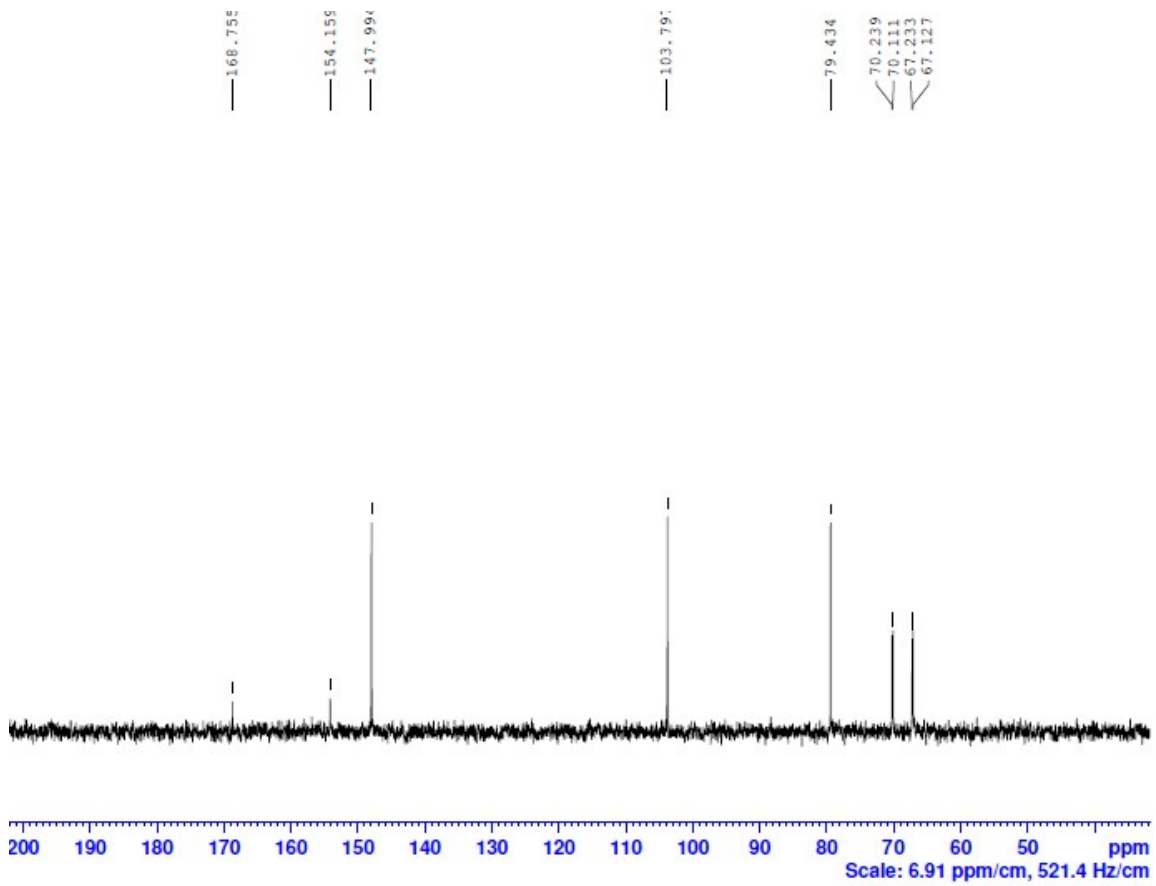

$^{13}\text{C}$  NMR spectra
